# Supplementary material for: Enhanced ethanol production from sugarcane molasses by industrially engineered Saccharomyces cerevisiae via replacement of the PHO4 gene
Source: Royal Society of Chemistry journal article supplement (doi:10.1039/c9ra08673k), 2020-01-01
Supplement: c9ra08673k1.pdf [file c9ra08673k1.pdf]

## Electronic Supplementary Information

### ARTICLE

# Enhanced ethanol production from sugarcane molasses by industrially engineered *Saccharomyces cerevisiae* via replacement of the *PHO4* gene

Renzhi Wu,<sup>ab</sup> Dong Chen,<sup>b</sup> Shuwei Cao,<sup>abc</sup> Zhilong Lu,<sup>ab</sup> Jun Huang,<sup>b</sup> Qi Lu,<sup>b</sup> Ying Chen,<sup>b</sup> Xiaoling Chen,<sup>b</sup> Ni Guan,<sup>b</sup> Yutuo Wei<sup>a</sup> and Ribo Huang<sup>\*ab</sup>

<sup>a</sup>State Key Laboratory for Conservation and Utilization of Subtropical Agro-bioresources, College of Life Science and Technology, Guangxi University, 100 Daxue Road, Nanning, Guangxi 530004, China. E-mail: rbhuang@vip.126.com

<sup>b</sup>National Engineering Research Center for Non-food Biorefinery, State Key Laboratory of Non-food Biomass Enzyme Technology, Guangxi Key Laboratory of Biorefinery, Guangxi Academy of Sciences, 98 Daling Road, Nanning, Guangxi 530007, China

<sup>c</sup>Guangxi Institute of Animal Science, 24 Yongwu Road, Nanning, Guangxi 530001, China

**Table S1.** Primer sequences used for PCR

| Gene        | Forward primer (5'-3') | Reverse primer (3'-5') |
|-------------|------------------------|------------------------|
| <i>PHO4</i> | TTTCAGCAAAGCGCCTCTT    | GAAGTCATGCTTCGGAAGGACC |

**Table S2.** Approaches for improved ethanol production of industrial *Saccharomyces cerevisiae* strains via genetic engineering (GE) or metabolic engineering (ME) or genome modification (GM)

| Name     | Details                                                                                                                                                                   | Approach         | References |
|----------|---------------------------------------------------------------------------------------------------------------------------------------------------------------------------|------------------|------------|
| UMArn3.3 | Intracellular free overexpression of <i>ISU1</i> and <i>JAC1</i> (pYES2 plasmid)                                                                                          | GE (OE)          | 1          |
| ZSp7Δ A  | Intracellular free overexpression of <i>TPS1</i> (pUG6E plasmid) and deletion of <i>ATH1</i>                                                                              | GE (OE + HR + Δ) | 2          |
| Sc4126z  | Intracellular free expression of pRS316ZFP-M01 (artificial zinc finger protein library, AZFP)                                                                             | GE (AZFP)        | 3          |
| KAM-12   | Intracellular integrated overexpression of <i>GLT1</i> in <i>gpd1</i> deletion (integrated to the genome based on homologous recombination)                               | GE (OE + HR)     | 4          |
| KAM-11   | Intracellular integrated overexpression of <i>GLT1</i> in <i>FPS1</i> deletion (integrated to the genome based on homologous recombination)                               | GE (OE + HR)     | 4          |
| TSS      | Deletion of <i>fps1</i> and expression of <i>GAPN</i> mutant, drug resistance marker-aided genome shuffling (with the Cre/loxP system, based on homologous recombination) | ME + GM (GS, HR) | 5          |
| IMI056   | Integrated cassette (pFA6a- <i>TRP1</i> - <i>P<sub>ADH1</sub></i> - <i>SUC2</i> ) into chromosome                                                                         | ME (HR)          | 6          |
| iETS2    | Integrating the SPT15 mutant alleles of ETS2 by gTME into chromosome                                                                                                      | GM (gTME + HR)   | 7          |
| iETS3    | Integrating the SPT15 mutant alleles of ETS3 by gTME into chromosome                                                                                                      | GM (gTME + HR)   | 7          |

| ARTICLE                 |                                                                                                                                                                        |                  | Journal Name |
|-------------------------|------------------------------------------------------------------------------------------------------------------------------------------------------------------------|------------------|--------------|
| YZ1                     | Three rounds genome shuffling of original strains Z8 and Z15 (sporulation and hybridisation) in combination with optimised initial selection                           | GM (GS)          | 8            |
| CAE1                    | Genome replication engineering- assisted continuous evolution (GREACE)                                                                                                 | GM (GREACE)      | 9            |
| M1                      | Error-prone PCR was employed to engineer the subunit Rpb7 of RNAP II                                                                                                   | TE + gTME        | 10           |
| ISO12                   | Using a long-term adaptation evolution strategy                                                                                                                        | AE               | 11           |
| PHY                     | Yeast surface display system (YSD)                                                                                                                                     | GE (YSD)         | 12           |
| BY4741X/ $\Delta$ PHO13 | Deletion of the PHO13 gene                                                                                                                                             | GE ( $\Delta$ )  | 13           |
| JX123_noxE              | Engineered through Cas9 (CRISPR associated protein 9)-based genome editing: auxotrophic mutants and introduced a xylose metabolic pathway into the auxotrophic mutants | ME (CRISPR/Cas9) | 14           |
| MEC1121                 | A novel metabolic pathway assembly tool called the Yeast Pathway Kit158 (YPK)                                                                                          | ME               | 15           |
| P6H9                    | Evolutionary engineering                                                                                                                                               | EE               | 16           |
| FL20                    | Flocculation gene FLO1 transferred into PE-2                                                                                                                           | GE               | 17           |
| MF01-PHO4 <sup>b</sup>  | Replacement of PHO4 gene                                                                                                                                               | GR (HR + DTL)    | This study   |

Note:  $\Delta$ , deletion of gene(s); GE, genetic engineering; ME, metabolic engineering; OE, overexpression; GM, genome modification; gTME, global transcription machinery engineering; GS, genome shuffling; AZFP, artificial zinc finger protein; HR, homologous recombination; TE, transcriptional engineering; AE, adaptive evolution; YSD, yeast surface display; design-test-learn (DTL).

## Electronic Supplementary Information

### ARTICLE

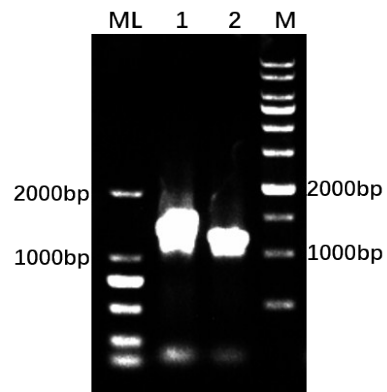

Fig. S1. Electrophoresis of *PHO4* fragment from *S. cerevisiae* MC15 on a 0.8% (w/v) agarose. Lane ML: DL2000 DNA Marker; Lane M: 1kb DNA Marker; Lane 1,2:

PCR product of *PHO4* fragment from *S. cerevisiae* MC15.

## Electronic Supplementary Information

## ARTICLE

**Table S3.** Comparison of the amino acid composition of Pho4 protein of *S. cerevisiae* MF01-PHO4, MF01 and S288C strain

| Amino Acid | Strain(GenBank Accession No.) |                |                |                |                  |                |
|------------|-------------------------------|----------------|----------------|----------------|------------------|----------------|
|            | MF01-PHO4(MK781979)           |                | MF01(MK781980) |                | S288C(NP 116692) |                |
|            | Frequency                     | Percentage (%) | Frequency      | Percentage (%) | Frequency        | Percentage (%) |
| Ala (A)    | 26                            | 8.3            | 26             | 8.3            | 26               | 8.3            |
| Arg (R)    | 17                            | 5.4            | 18             | 5.8            | 18               | 5.8            |
| Asn (N)    | 19                            | 6.1            | 19             | 6.1            | 19               | 6.1            |
| Asp (D)    | 18                            | 5.8            | 18             | 5.8            | 18               | 5.8            |
| Cys (C)    | 1                             | 0.3            | 1              | 0.3            | 1                | 0.3            |
| Gln (Q)    | 10                            | 3.2            | 10             | 3.2            | 10               | 3.2            |
| Glu (E)    | 20                            | 6.4            | 20             | 6.4            | 20               | 6.4            |
| Gly (G)    | 13                            | 4.2            | 12             | 3.8            | 12               | 3.8            |
| His (H)    | 13                            | 4.2            | 13             | 4.2            | 13               | 4.2            |
| Ile (I)    | 11                            | 3.5            | 12             | 3.8            | 11               | 3.5            |
| Leu (L)    | 22                            | 7.1            | 22             | 7.1            | 22               | 7.1            |
| Lys (K)    | 21                            | 6.7            | 20             | 6.4            | 20               | 6.4            |
| Met (M)    | 5                             | 1.6            | 5              | 1.6            | 5                | 1.6            |
| Phe (F)    | 5                             | 1.6            | 5              | 1.6            | 5                | 1.6            |
| Pro (P)    | 23                            | 7.4            | 23             | 7.4            | 23               | 7.4            |
| Ser (S)    | 40                            | 12.8           | 40             | 12.8           | 40               | 12.8           |
| Thr (T)    | 22                            | 7.1            | 22             | 7.1            | 22               | 7.1            |
| Trp (W)    | 2                             | 0.6            | 2              | 0.6            | 2                | 0.6            |
| Tyr (Y)    | 4                             | 1.3            | 4              | 1.3            | 4                | 1.3            |
| Val (V)    | 20                            | 6.4            | 20             | 6.4            | 21               | 6.7            |

**Table S4.** Comparison of characteristics of Pho4 protein of *S. cerevisiae* MF01-PHO4, MF01 and S288C strain

| Strain    | Formula                             | Total number of atoms | Molecular weight | Theoretical Isoelectric point (pI) | Aliphatic index | Instability index |
|-----------|-------------------------------------|-----------------------|------------------|------------------------------------|-----------------|-------------------|
| MF01-PHO4 | $C_{1460}H_{2351}N_{441}O_{484}S_6$ | 4742                  | 34018.75         | 7.25                               | 68.17           | 58.79             |
| MF01      | $C_{1464}H_{2359}N_{443}O_{484}S_6$ | 4756                  | 34102.87         | 7.25                               | 69.42           | 61.11             |
| S288C     | $C_{1463}H_{2357}N_{443}O_{484}S_6$ | 4753                  | 34089.30         | 7.95                               | 65.85           | 61.01             |

Note: references to the website(1) SGD: <https://www.yeastgenome.org/locus/S000001930/protein>, (2) Expasy : <http://web.expasy.org/protparam/>

## Electronic Supplementary Information

## ARTICLE

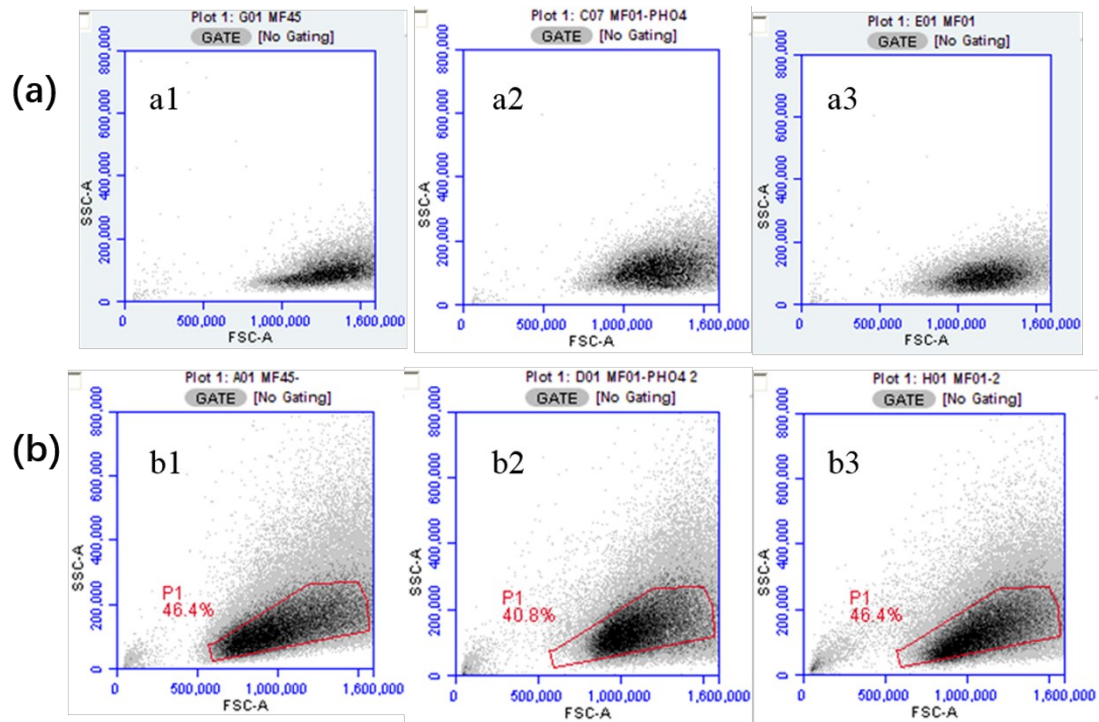

Fig. S2. Flow cytometric results (FSC/SSC) of *S. cerevisiae* MC15, MF01-PHO4 and MF01 strain; (a) Cultivated in YPD at 30°C, shaking at 200 rpm for 8 h; (B) Cultivated in YPS40 at 30°C, shaking at 180 rpm for 48 h; a1 or b1, *S. cerevisiae* MC15 strain; a2 or b2, recombinant *S. cerevisiae* MF01-PHO4 strain; a3 or b3, *S. cerevisiae* MF01 strain

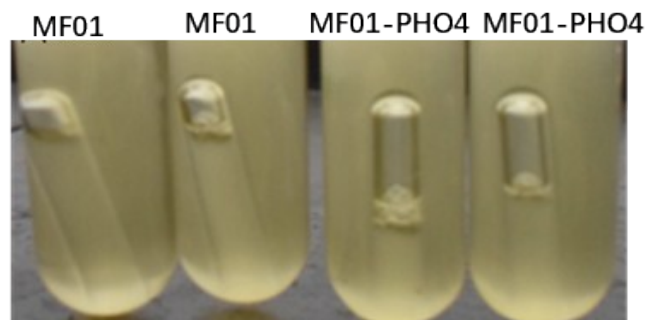

Fig. S3 Gas production from *S. cerevisiae* MF01 and engineered MF01-PHO4 strain

## Electronic Supplementary Information

## ARTICLE

Table S5. Summary of ethanol production from SCM by *S. cerevisiae* strains

| Name              | Tm (°C) | Production (g L <sup>-1</sup> ) | Yield (g Ethanol /g sugar) | Fermentation Efficiency (%) | pH          | References |
|-------------------|---------|---------------------------------|----------------------------|-----------------------------|-------------|------------|
| ITV-01            | 30      | 85.00                           | 0.4100                     | 80.39                       | 5.5         | 18         |
| Illovo            | 30      | 87.00                           | 0.4341                     | 85.12                       | ----        | 19         |
| M Type            | 32      | 82.17                           | ----                       | ----                        | ----        | 20         |
| CAT-1             | 30-32   | 79.25                           | ----                       | ----                        | ----        | 21         |
| CAT-1             | 30      | 86.82                           | ----                       | ----                        | ----        | 21         |
| PE-2              | 30-32   | 66.06                           | 0.4700                     | 92.16                       | ----        | 21         |
| PE-2              | 35      | 72.62                           | ----                       | ----                        | ----        | 22         |
| <i>ΔRIM15ΔMS</i>  | 35      | 77.35                           | ----                       | ----                        | ----        | 22         |
| VR1               | 30-32   | 50.91                           | ----                       | ----                        | ----        | 21         |
| BG1               | 30-32   | 59.28                           | 0.4900                     | 96.08                       | ----        | 21         |
| JP1               | 30-32   | 56.20                           | 0.4700                     | 92.16                       | ----        | 23         |
| UAF-1             | 31-33   | 96.29                           | ----                       | ----                        | 4.0-<br>4.5 | 24         |
| y7                | 28-35   | 68.35                           | 0.3817                     | 74.85                       | 6           | 25         |
| F396              | 28-35   | 68.98                           | ----                       | ----                        | 6           | 25         |
| 345               | 28-35   | 70.41                           | ----                       | ----                        | 6           | 25         |
| Rasse XII         | 28-35   | 72.77                           | 0.3917                     | 76.80                       | 6           | 25         |
| 109               | 28-35   | 72.93                           | ----                       | ----                        | 6           | 25         |
| 115               | 28-35   | 68.75                           | ----                       | ----                        | 6           | 25         |
| 116               | 28-35   | 69.85                           | ----                       | ----                        | 6           | 25         |
| Rlle IID          | 28-35   | 67.25                           | ----                       | ----                        | 6           | 25         |
| Sacch.Sake        | 28-35   | 69.54                           | ----                       | ----                        | 6           | 25         |
| MF02              | 30      | 114.29                          | ----                       | ----                        | 3.9         | 26         |
| MF03              | 30      | 106.56                          | ----                       | ----                        | 3.9         | 26         |
| AQ01              | 30      | 89.19                           | ----                       | ----                        | 3.9         | 26         |
| AQ02              | 30      | 88.88                           | ----                       | ----                        | 3.9         | 26         |
| NF-ybr            | 30      | 98.82                           | ----                       | ----                        | 3.9         | 27         |
| MF01 <sup>e</sup> | 30      | 108.61                          | 0.4789                     | 93.90                       | 3.6-<br>3.8 | 28         |
| 100-294           | 37      | 73.0                            | ----                       | ----                        | 5.5         | 29         |
| AQ01              | 37      | 86.35                           | ----                       | ----                        | 3.9         | 26         |
| AQ02              | 37      | 85.80                           | ----                       | ----                        | 3.9         | 26         |
| MF02              | 37      | 95.19                           | ----                       | ----                        | 3.9         | 26         |
| MF03              | 37      | 95.82                           | ----                       | ----                        | 3.9         | 26         |
| MF01              | 37      | 94.95                           | ----                       | ----                        | 3.9         | 26         |

|           |    |               |        |       |     |            |
|-----------|----|---------------|--------|-------|-----|------------|
| MC15      | 30 | 82.16 ± 0.79  | 0.3510 | 68.83 | 3.8 | This study |
| MF01      | 30 | 108.94 ± 0.71 | 0.4654 | 91.26 | 3.8 | This study |
| MF01-PHO4 | 30 | 114.71 ± 0.24 | 0.4901 | 96.10 | 3.8 | This study |

Note: <sup>a</sup>annual production of 50,000 tonnes of ethanol from SCM fermentation

## References

- Martínez-Alcántar, A. Madrigal, L. Sánchez-Briones, A. L. Díaz-Pérez, J. S. López-Bucio and J. Campos-García, *J. Ind. Microbiol. Biotechnol.*, 2019, **46**, 925–936.
- P. M. Wang, D. Q. Zheng, X. Q. Chi, O. Li, C. D. Qian, T. Z. Liu, X. Y. Zhang, F. G. Du, P. Y. Sun, A. M. Qu and X. C. Wu, *Bioresour. Technol.*, 2014, **152**, 371–376.
- C. Ma, X. Q. Zhao, Q. Li, M. M. Zhang, J. S. Kim and F. W. Bai, *Chin J Biotech.*, 2013, **29**, 612–619.
- Q. X. Kong, L. M. Cao, A. L. Zhang and X. Chen, *Appl. Microbiol. Biotechnol.*, 2007, **73**, 1382–1386.
- P. M. Wang, D. Q. Zheng, T. Z. Liu, X. L. Tao, M. G. Feng, H. Min, X. H. Jiang and X. C. Wu, *Bioresour. Technol.*, 2012, **108**, 203–210.
- T. O. Basso, S. de Kok, M. Dario, J. C. A. do Espirito-Santo, G. Müller, P. S. Schlögl, C. P. Silva, A. Tonso, J. M. Daran, A. K. Gombert, A. J. A. van Maris, J. T. Pronk and B. U. Stambuk, *Metab. Eng.*, 2011, **13**, 694–703.
- J. Yang, J. Y. Bae, Y. M. Lee, H. Kwon, H. Y. Moon, H. A. Kang, S. Yee, W. Kim and W. Choi, *Biotechnol. Bioeng.*, 2011, **108**, 1776–1787.
- D. Q. Zheng, X. C. Wu, X. L. Tao, P. M. Wang, P. Li, X. Q. Chi, Y. D. Li, Q. F. Yan and Y. H. Zhao, *Bioresour. Technol.*, 2011, **102**, 3020–3027.
- X. Xu, C. Liu, C. Niu, J. Wang, F. Zheng, Y. Li and Q. Li, *J. Ind. Microbiol. Biotechnol.*, 2018, **45**, 869–880.
- Z. Qiu and R. Jiang, *Biotechnol. Biofuels*, 2017, **10**, 1–13.
- V. Wallace-Salinas and M. F. Gorwa-Grauslund, *Biotechnol. Biofuels.*, 2013, **6**, 1–9.
- X. Chen, Y. Xiao, W. Shen, A. Govender, L. Zhang, Y. Fan and Z. Wang, *Appl. Microbiol. Biotechnol.*, 2016, **100**, 2449–2458.
- K. Fujitomi, T. Sanda, T. Hasunuma and A. Kondo, *Bioresour. Technol.*, 2012, **111**, 161–166.
- Y. G. Lee, Y. S. Jin, Y. L. Cha and J. H. Seo, *Bioresour. Technol.*, 2017, **228**, 355–361.
- A. Romani, F. Pereira, B. Johansson and L. Domingues, *Bioresour. Technol.*, 2014, **179**, 150–158.
- N. T. Sehnem, A. da Silva Machado, F. C. B. Leite, W. de Barros Pita, M. A. de Moraes and M. A. Z. Ayub, *Bioresour. Technol.*, 2013, **133**, 190–196.
- D. G. Gomes, P. M. R. Guimarães, F. B. Pereira, J. A. Teixeira and L. Domingues, *Bioresour. Technol.*, 2012, **108**, 162–168.
- Z. Nofemele, P. Shukla, A. Trussler, K. Permaul and S. Singh, *J. Brew. Distill.*, 2012, **3**, 29–35.
- E. A. Da Silva Filho, H. F. De Melo, D. F. Antunes, S. K. B. Dos Santos, A. Do Monte Resende, D. A. Simões and M. A. De Moraes, *J. Ind. Microbiol. Biotechnol.*, 2005, **32**, 481–486.
- B. H. de Amorim Neto, Master thesis, University of Abertay Dundee, 2005.
- H. B. de A. Neto, B. K. Yohannan, T. A. Bringhurst, J. M. Brosnan, S. Y. Pearson, J. W. Walker and G. M. Walker, *J. Inst. Brew.*, 2009, **115**, 198–207.
- T. Inai, D. Watanabe, Y. Zhou, R. Fukada, T. Akao, J. Shima, H. Takagi and H. Shimoi, *J. Biosci. Bioeng.*, 2013, **116**, 591–594.
- E. A. Da Silva Filho, H. F. De Melo, D. F. Antunes, S. K. B. Dos Santos, A. Do Monte Resende, D. A. Simões and M. A. De Moraes, *J. Ind. Microbiol. Biotechnol.*, 2005, **32**, 481–486.
- M. Arshad, T. Hussain, M. Iqbal and M. Abbas, *Brazilian J. Microbiol.*, 2017, **48**, 403–409.
- Z. S. Xiong, *Liquor-making Science Technology.*, 2002, **112**, 23–27. (In Chinese)
- Q. Lu, S. S. Zhang, R. Z. Wu and R. B. Huang, *Guangxi Sciences*, 2010, **17**, 368–372, 376. (In Chinese)
- Y. Y. Huang, L. Guo, D. Chen, S. Y. Long, J. X. Li, Q. Lu, L. Sun and R. B. Huang, *Guangxi Sciences*, 2014, **21**, 108–114. (In Chinese)
- D. Chen, Q. Lu, S. S. Zhang, Y. Chen and R. B. Huang, *Guangxi Sciences*, 2011, **18**, 385–391. (In Chinese)
- S. Pattanakittivorakul, N. Lertwattanasakul, M. Yamada and S. Limtong, *Antonie van Leeuwenhoek Int. J. Gen. Mol. Microbiol.*, 2019, **112**, 975–990.
